# Supplementary material for: A Review of Long-Term Toxicity of Antiretroviral Treatment Regimens and Implications for an Aging Population
Source: Springer Nature journal article supplement (doi:10.1007/s40121-018-0201-6), 2018-05-14
Supplement: MOESM1 [file 15762010]

## SUPPLEMENTARY MATERIAL

Table S1. PubMed Search Strings for Long-term Toxicity and Tolerability (Conducted January 16, 2017)

| Search # | Topic                     | Search string                                                                                                                                                                                                                                                                                                                  | Results (1/16/2017) |
|----------|---------------------------|--------------------------------------------------------------------------------------------------------------------------------------------------------------------------------------------------------------------------------------------------------------------------------------------------------------------------------|---------------------|
| 1        | Disease                   | ((Human immunodeficiency virus[tiab] OR HIV[tiab] OR Acquired immunodeficiency syndrome[tiab] OR AIDS[tiab]) AND (combination antiretroviral therapy[tiab] OR antiretroviral therapy[tiab] OR CART[tiab] OR ART[tiab]))                                                                                                        | 34913               |
| 2        | Human                     | Human[MH]                                                                                                                                                                                                                                                                                                                      | 16,191,688          |
| 3        | Toxicity and tolerability | (toxic* [tiab] OR peripheral neuropathy[tiab] OR pancreatitis[tiab] OR lactic acidosis[tiab] OR dyslipidemia[tiab] OR dysglycemia[tiab] OR insulin resistance[tiab] or diabet*[tiab] OR osteopenia[tiab] or osteoporosis[tiab] OR lipodystrophy[tiab] OR hepatotoxicity [tiab] OR end-stage renal disease[tiab] OR ESRD[tiab]) | 1,225,587           |
| 4        | Long term                 | ("long-term"[tiab] OR "long term"[tiab] OR chronic[tiab] OR "extended use"[tiab])                                                                                                                                                                                                                                              | 1,517,304           |
| 5        | Filters                   | Filter: Publication date from 2015/4/01 – [date of search], Full Text                                                                                                                                                                                                                                                          | N/A                 |
| 6        | Final Toxicity Search     | All combined                                                                                                                                                                                                                                                                                                                   | 77                  |

Table S2. PubMed Search Strings for Long-term Economic Burden (Conducted January 16, 2017)

| Search # | Topic     | Search string                                                                                                                                                                                                                                                                                                                                                                                                                                                                                                                                                                                                                                                                                                                                                                                                      | Results (1/16/2017) |
|----------|-----------|--------------------------------------------------------------------------------------------------------------------------------------------------------------------------------------------------------------------------------------------------------------------------------------------------------------------------------------------------------------------------------------------------------------------------------------------------------------------------------------------------------------------------------------------------------------------------------------------------------------------------------------------------------------------------------------------------------------------------------------------------------------------------------------------------------------------|---------------------|
| 1        | Disease   | Human immunodeficiency virus[ti] OR HIV[ti]<br>OR Acquired immunodeficiency syndrome[ti]<br>OR AIDS[ti]                                                                                                                                                                                                                                                                                                                                                                                                                                                                                                                                                                                                                                                                                                            | 242,111             |
| 2        | Treatment | treatment[ti] OR therapy[ti] OR CART[ti] OR<br>ART[ti]                                                                                                                                                                                                                                                                                                                                                                                                                                                                                                                                                                                                                                                                                                                                                             | 1,449,437           |
| 3        |           | dolutegravir[tiab] OR raltegravir[tiab] OR<br>abacavir[tiab] OR lamivudine[tiab] OR<br>Epzicom[tiab] OR zidovudine[tiab] OR<br>Trizivir[tiab] OR didanosine[tiab] OR<br>emtricitabine[tiab] OR tenofovir[tiab] OR<br>Descovy[tiab] OR Truvada[tiab] OR<br>stavudine[tiab] OR zidovudine[tiab] OR<br>delavirdine[tiab] OR efavirenz[tiab] OR<br>etravirine[tiab] OR nevirapine[tiab] OR<br>rilpivirine[tiab] OR atazanavir[tiab] OR<br>Evotaz[tiab] OR atazanavir[tiab] OR<br>darunavir[tiab] OR Prezcoibix[tiab] OR<br>fosamprenavir[tiab] OR indinavir[tiab] OR<br>lopinavir[tiab] OR Kaletra[tiab] OR<br>saquinavir[tiab] OR tipranavir[tiab] OR<br>ritonavir[tiab] OR cobicistat[tiab] OR<br>enfuvirtide[tiab] OR maraviroc[tiab] OR<br>Triumeq[tiab] OR Genvoya[tiab] OR<br>Stribild[tiab] OR Atripla[tiab] OR | 30,018              |

| Search # | Topic                    | Search string                                                                                                                                                                                                                                                                                                                                                | Results (1/16/2017) |
|----------|--------------------------|--------------------------------------------------------------------------------------------------------------------------------------------------------------------------------------------------------------------------------------------------------------------------------------------------------------------------------------------------------------|---------------------|
|          |                          | Odefsey[tiab] OR Complera[tiab]                                                                                                                                                                                                                                                                                                                              |                     |
| 4        |                          | integrase strand transfer inhibitor[tiab] OR INSTI[tiab] OR nucleoside reverse transcriptase inhibitor[tiab] OR nucleotide reverse transcriptase inhibitor[tiab] OR fusion inhibitor[tiab] OR NRTI[tiab] or non-nucleoside reverse transcriptase inhibitor[tiab] OR NNRTI[tiab] OR protease inhibitor[tiab] OR chemokine receptor type 5[tiab] OR CCR5[tiab] | 28,052              |
| 5        |                          | #2 OR #3 OR #4                                                                                                                                                                                                                                                                                                                                               | 1,491,493           |
| 6        | Safety/toxicity          | safety[ti] OR adverse event[ti] OR toxicit*[ti]                                                                                                                                                                                                                                                                                                              | 164,008             |
| 7        | Economic/<br>utilization | resource utilization[tiab] OR resource use [tiab] resource util*[tiab]                                                                                                                                                                                                                                                                                       | 6338                |
| 8        |                          | economic*[tiab] OR cost*[tiab] OR indirect cost*[tiab] OR burden*[tiab]                                                                                                                                                                                                                                                                                      | 661,448             |
| 9        |                          | productivity[tiab] OR absentee*[tiab] OR presentee*[tiab] OR work disabilit*[tiab] OR sick leave[tiab] OR sick day*[tiab] OR lost earning*[tiab] OR foregone wage*[tiab] OR lost wage*[tiab]                                                                                                                                                                 | 51,612              |
| 10       |                          | outpatient visit*[tiab] OR physician visit*[tiab]                                                                                                                                                                                                                                                                                                            | 6405                |
| 11       |                          | emergency room*[tiab] OR ER visit[tiab] OR ED visit[tiab] OR emergency                                                                                                                                                                                                                                                                                       | 270,420             |

| <b>Search #</b> | <b>Topic</b> | <b>Search string</b>                                                                                                       | <b>Results (1/16/2017)</b> |
|-----------------|--------------|----------------------------------------------------------------------------------------------------------------------------|----------------------------|
|                 |              | department*[tiab] OR hospitaliz*[tiab] OR<br>inpatient admission*[tiab] OR length of<br>stay*[tiab] OR hospital day*[tiab] |                            |
| <b>12</b>       |              | #7 OR #8 OR #9 OR #10 OR #11                                                                                               | 944,766                    |
| <b>13</b>       | All combined | #1 AND #5 AND #6 AND #12                                                                                                   | 28                         |
